# Supplementary material
Source: PubMed Central journal article supplement (PMC7357734)

**A**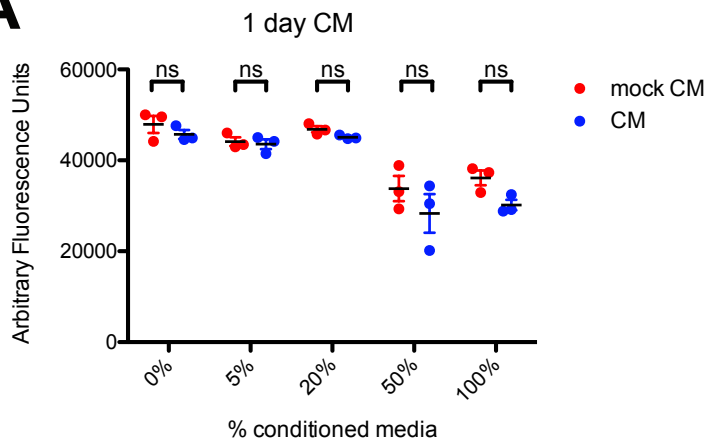**B**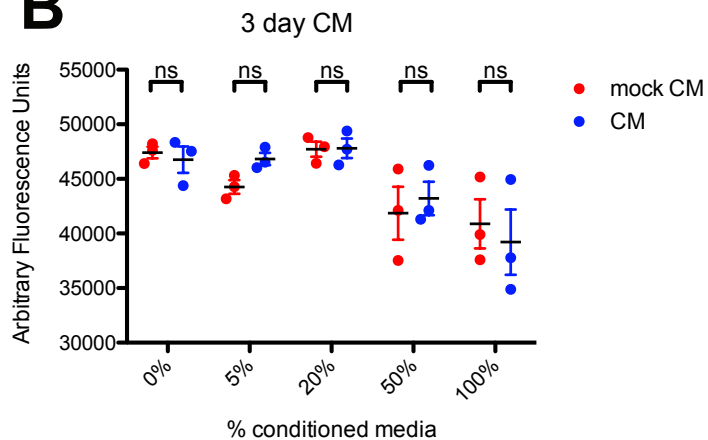**C**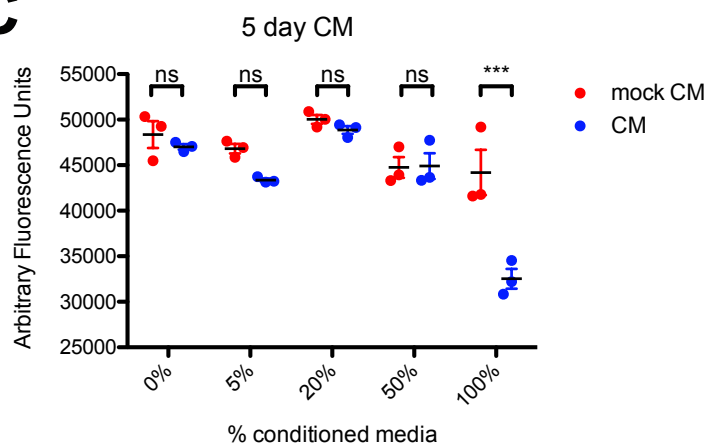**D**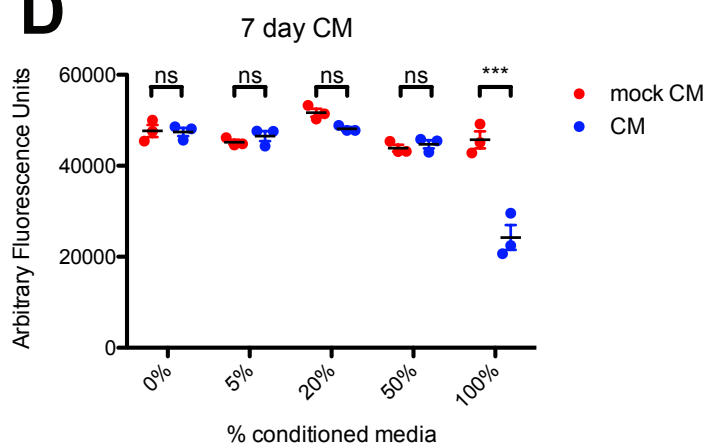**E**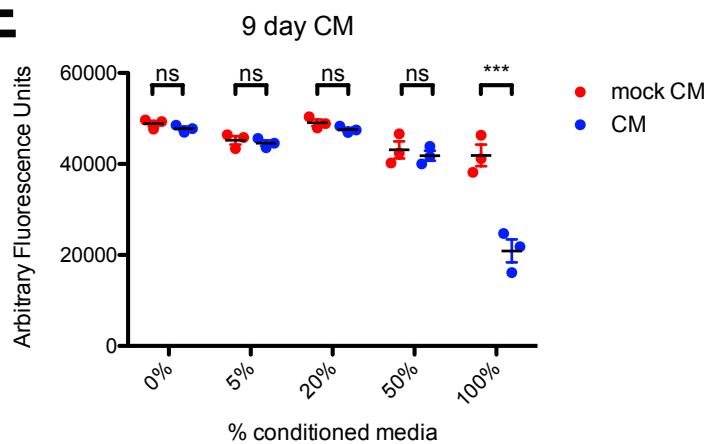**F**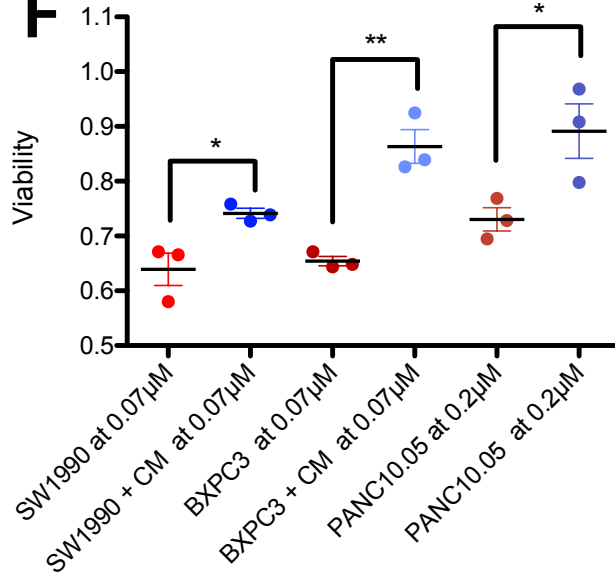**G**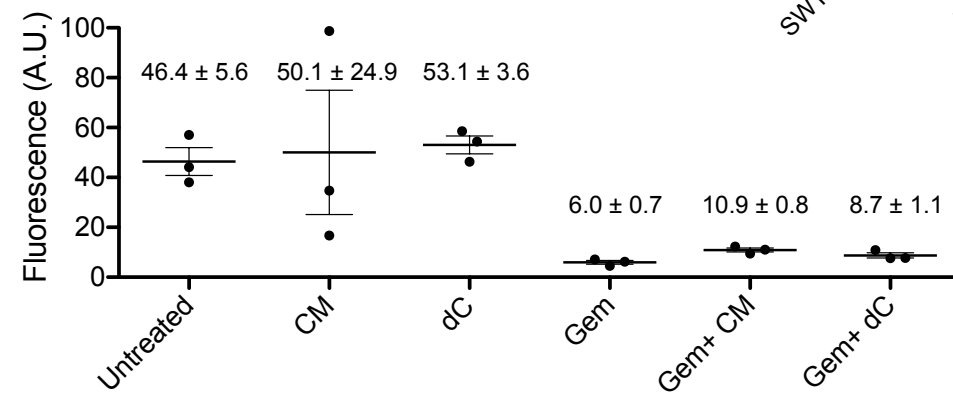

Supplement: NIHMS1539265-supplement-1.pdf [file NIHMS1539265-supplement-1.pdf]

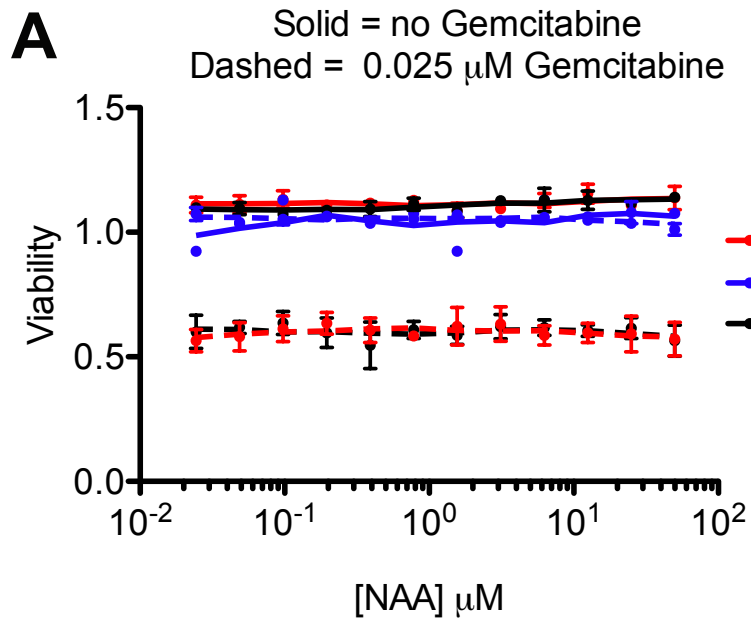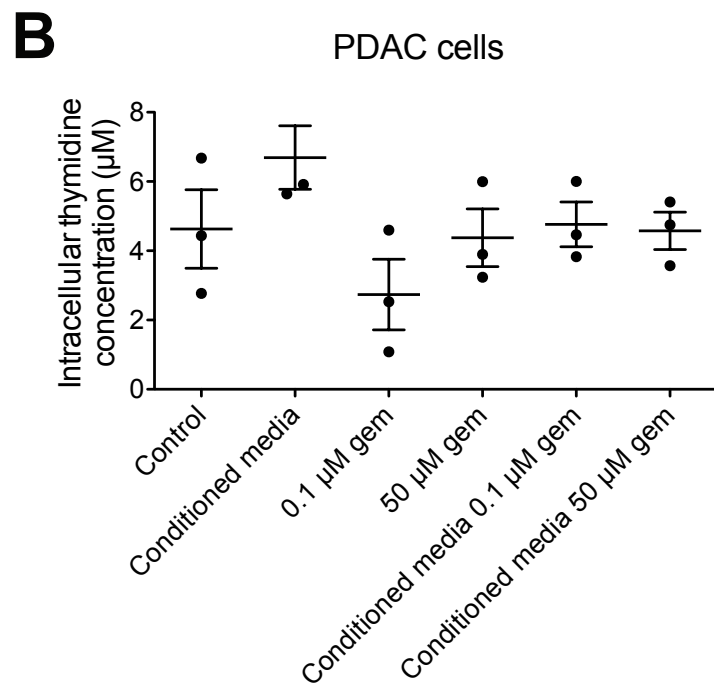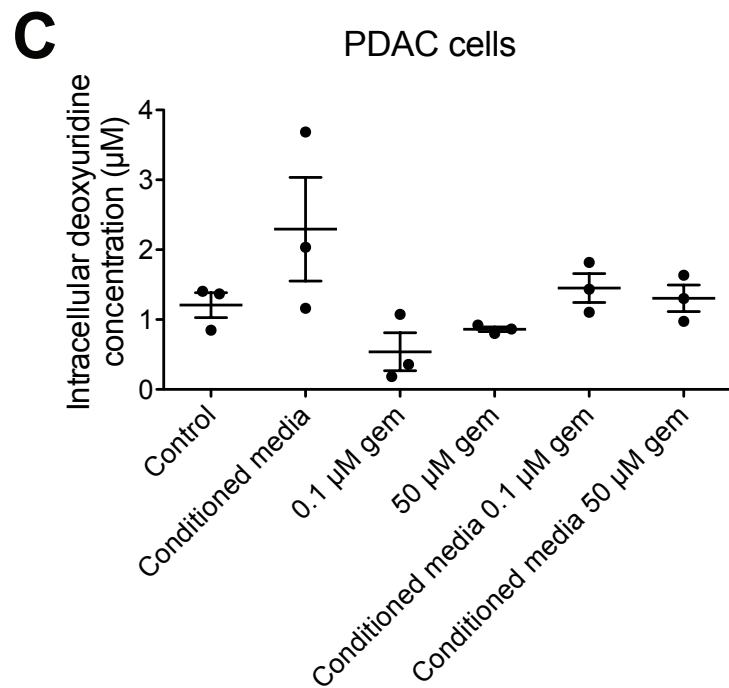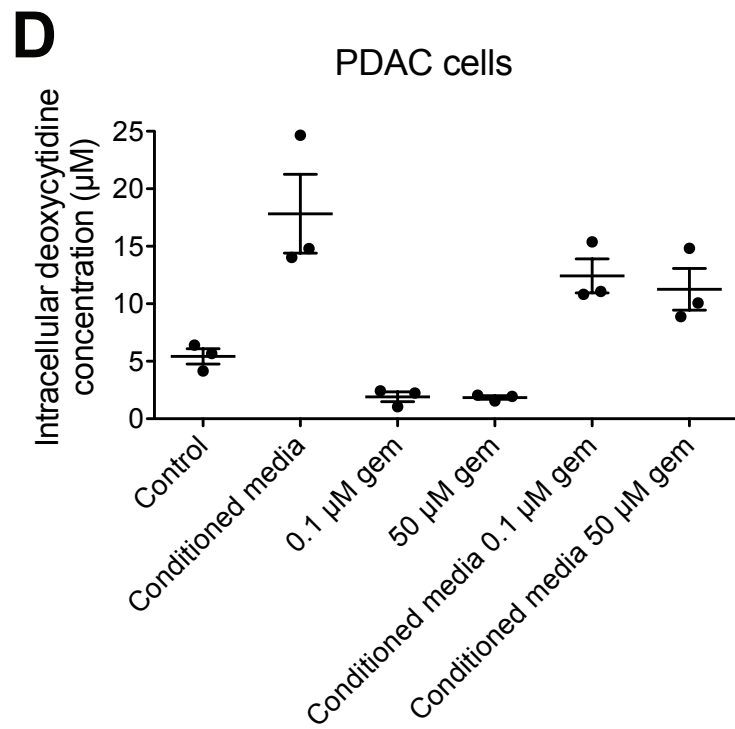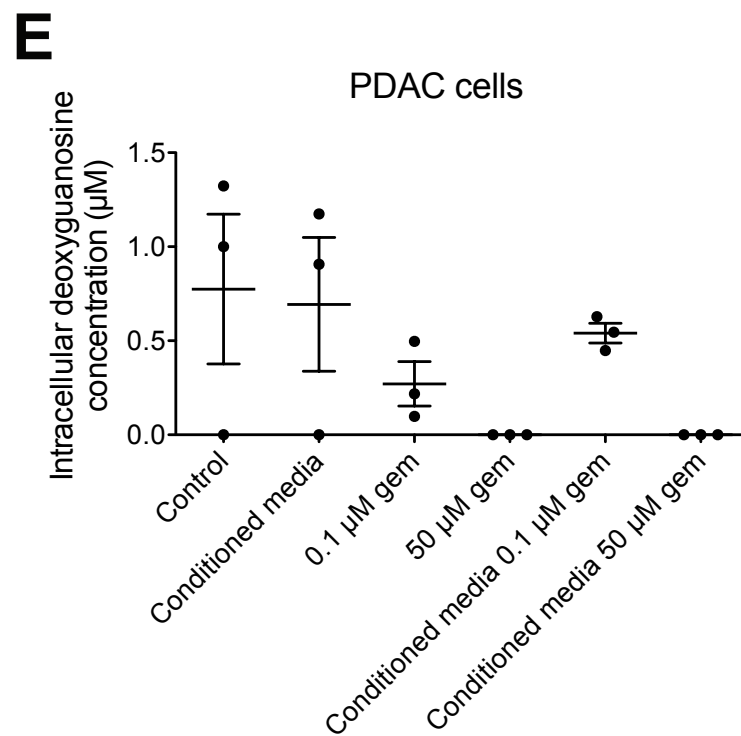

Supplement: NIHMS1539265-supplement-2.pdf [file NIHMS1539265-supplement-2.pdf]

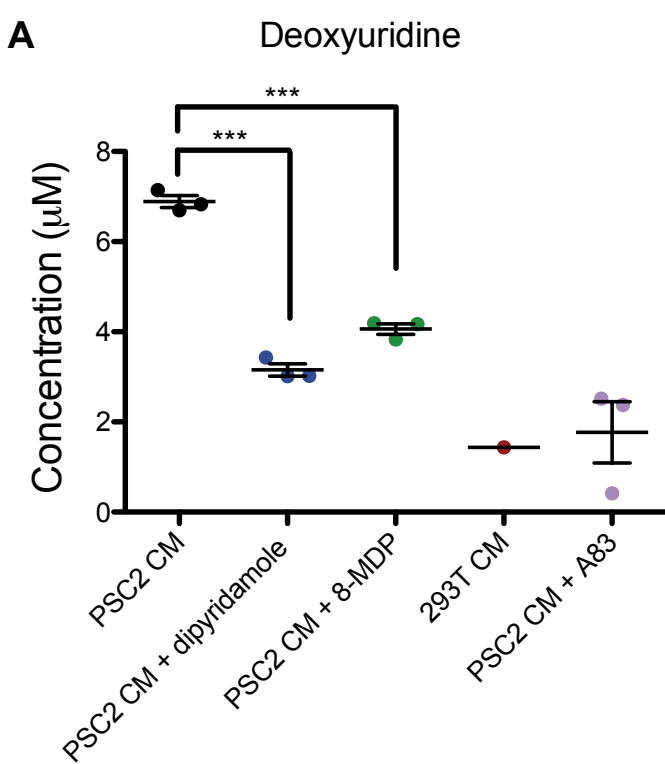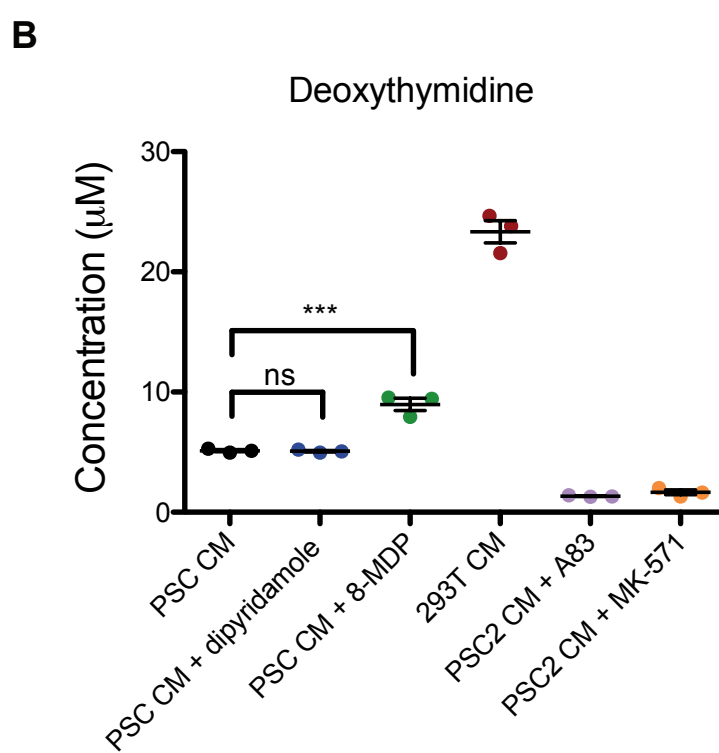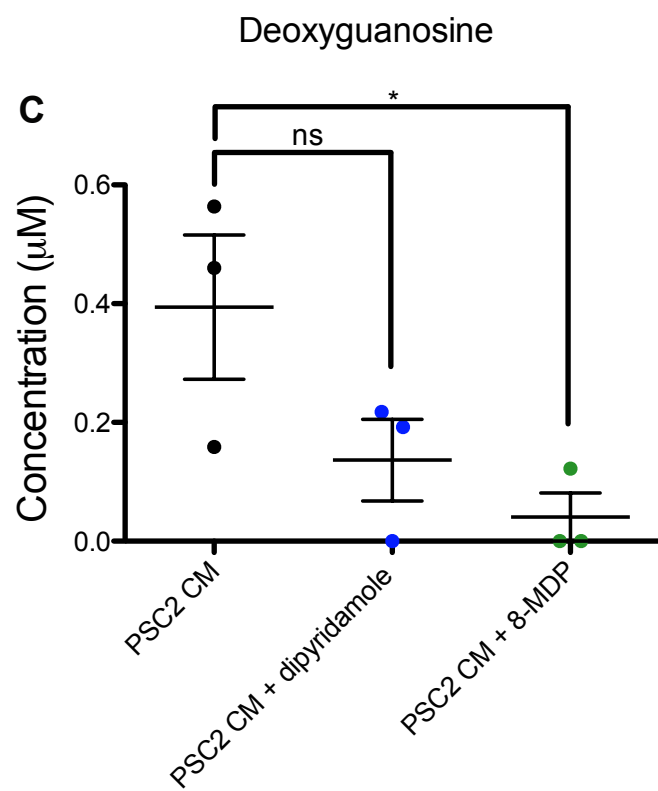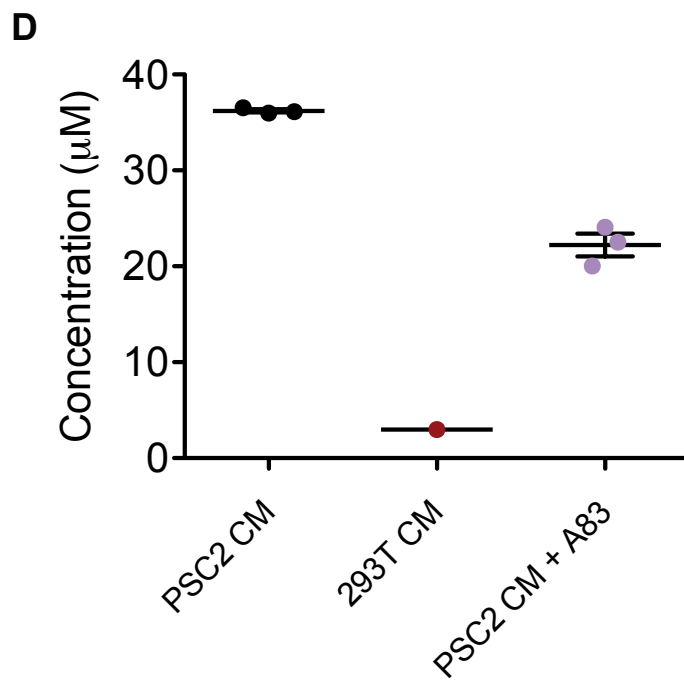

Supplement: NIHMS1539265-supplement-3.pdf [file NIHMS1539265-supplement-3.pdf]

8-MDP (6.67  $\mu$ M)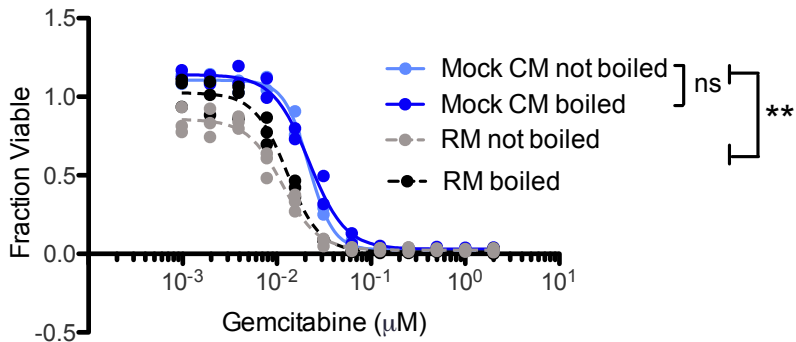Dipyridamole (6.67  $\mu$ M)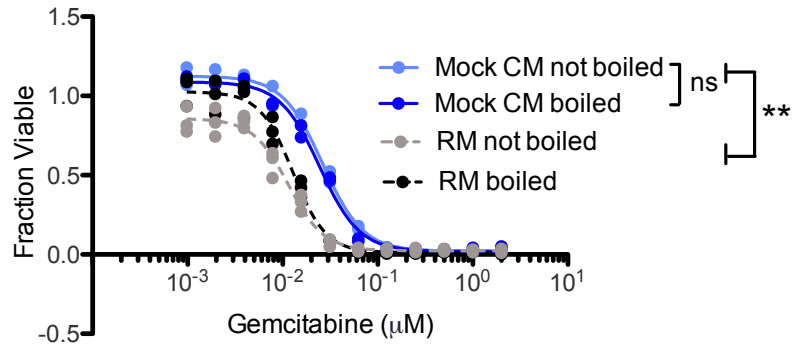

Supplement: NIHMS1539265-supplement-4.pdf [file NIHMS1539265-supplement-4.pdf]

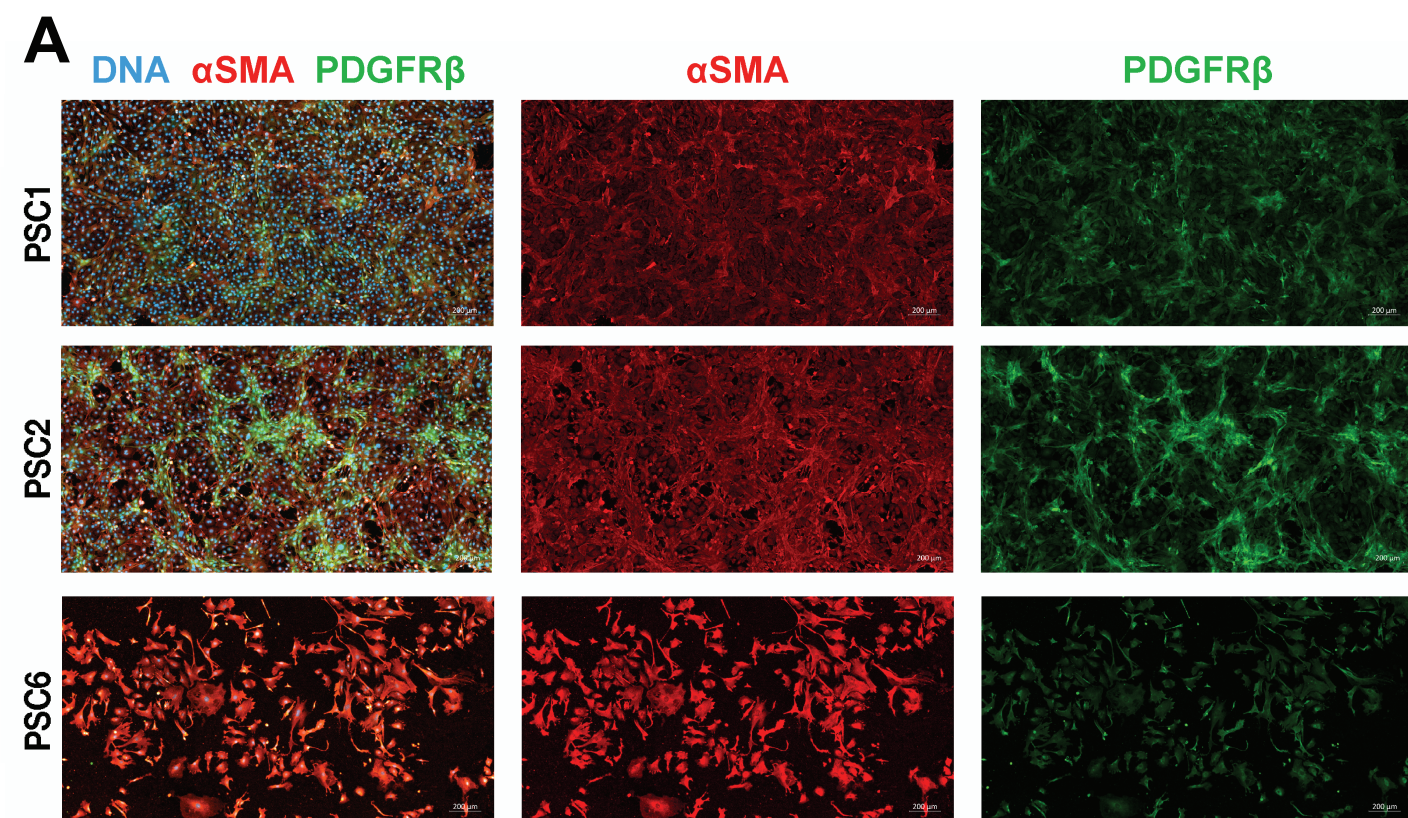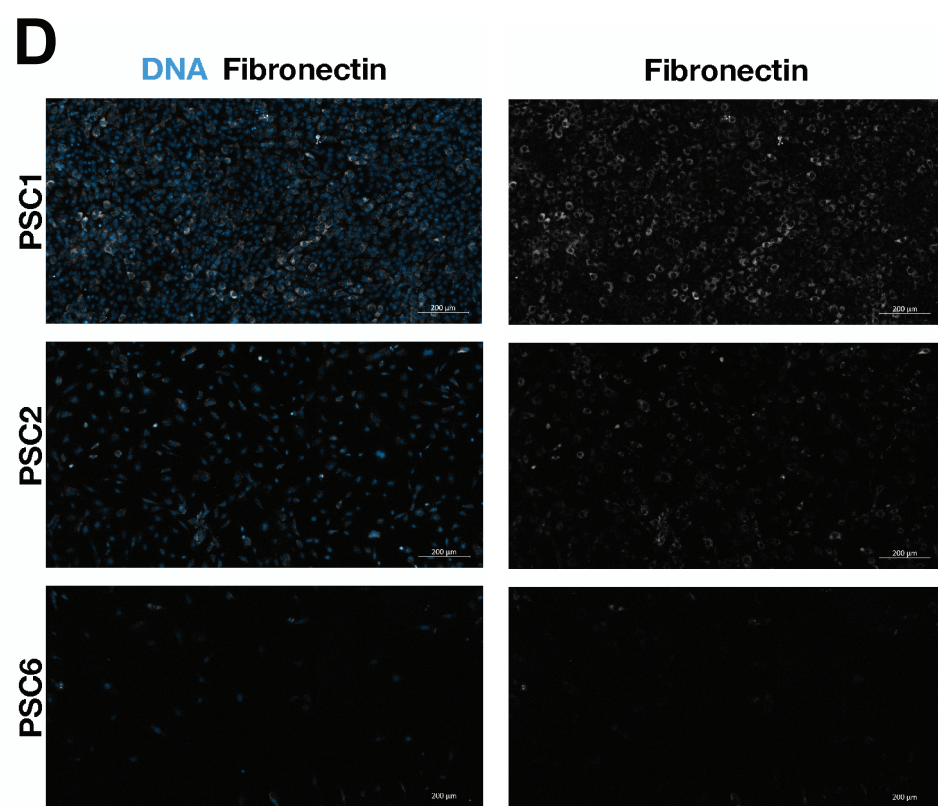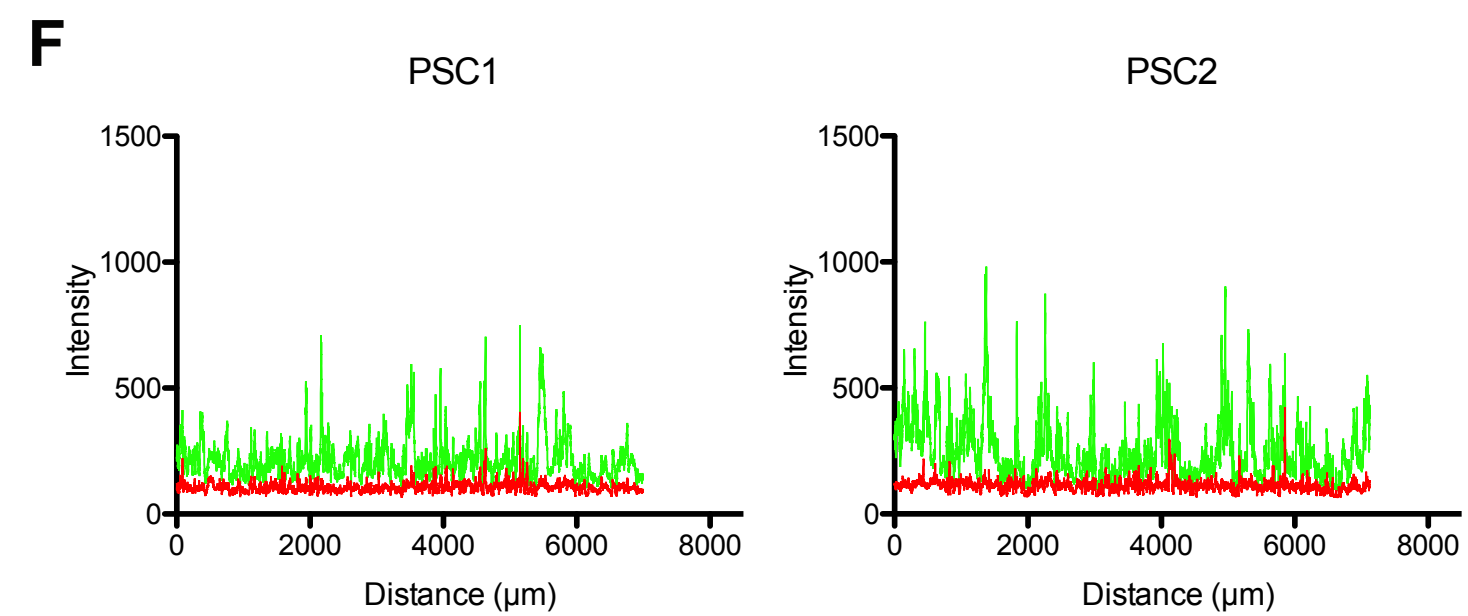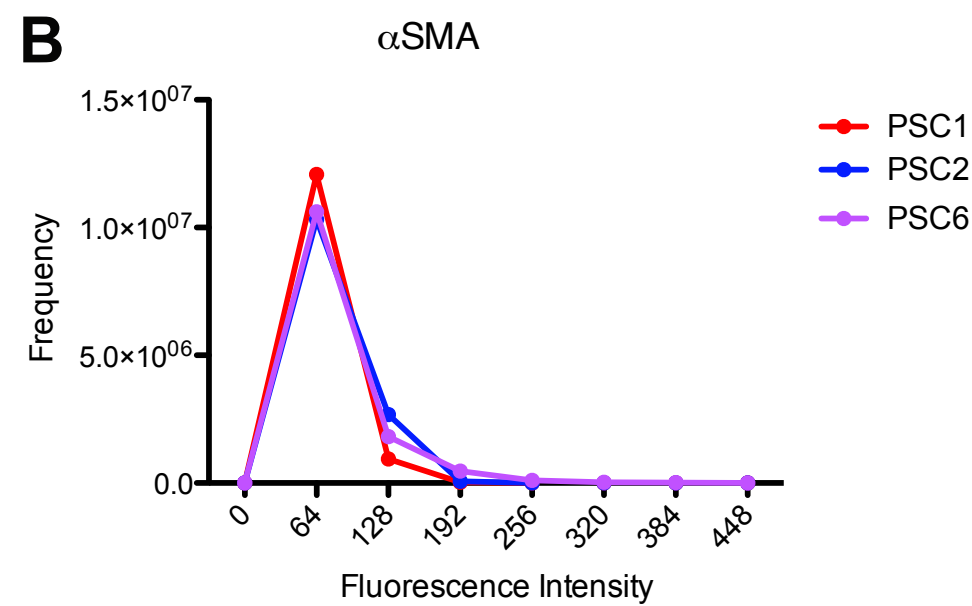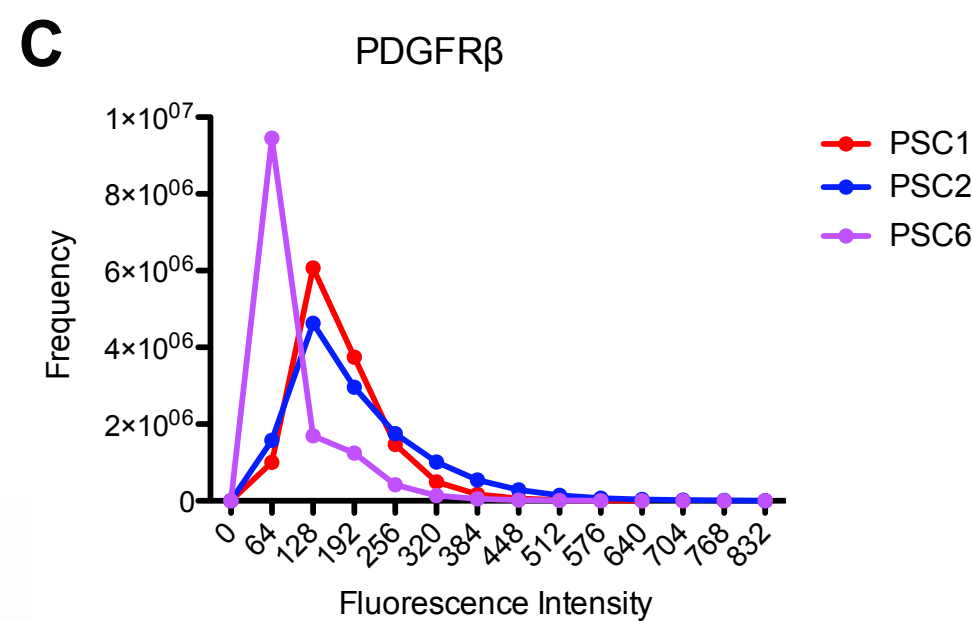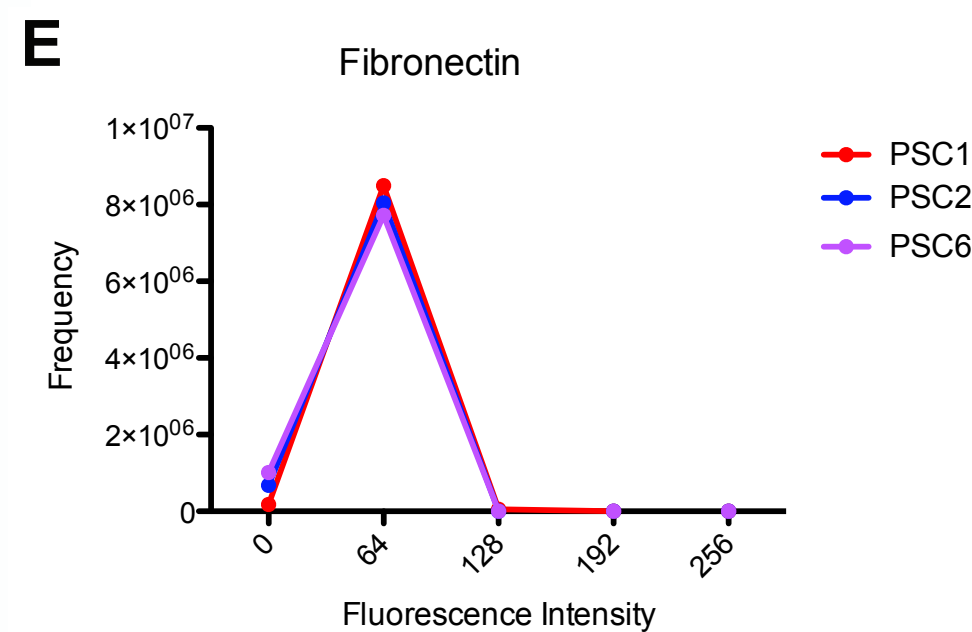

Supplement: NIHMS1539265-supplement-5.pdf [file NIHMS1539265-supplement-5.pdf]
